# Supplementary material for: Superior low temperature activity over α-MnO2/β-MnOOH catalyst for selective catalytic reduction of NOx with ammonia
Source: Royal Society of Chemistry journal article supplement (doi:10.1039/d4ra05934d), 2024-01-01
Supplement: d4ra05934d1.pdf [file d4ra05934d1.pdf]

## Supporting Information

### Superior Low Temperature Activity over $\alpha$ -MnO<sub>2</sub>/ $\beta$ -MnOOH Catalyst for Selective Catalytic Reduction of NO<sub>x</sub> with Ammonia.

*Masanori Takemoto, Haruko Fujinuma, Yoshihiro Sugawara, Yukichi Sasaki, Kenta Iyoki, Tatsuya Okubo,  
Kazuya Yamaguchi, Toru Wakihara*

|                  |          |
|------------------|----------|
| <b>Figure S1</b> | <b>2</b> |
| <b>Table S1</b>  | <b>3</b> |
| <b>Reference</b> | <b>4</b> |

(a)  $\alpha$ -MnO<sub>2</sub>

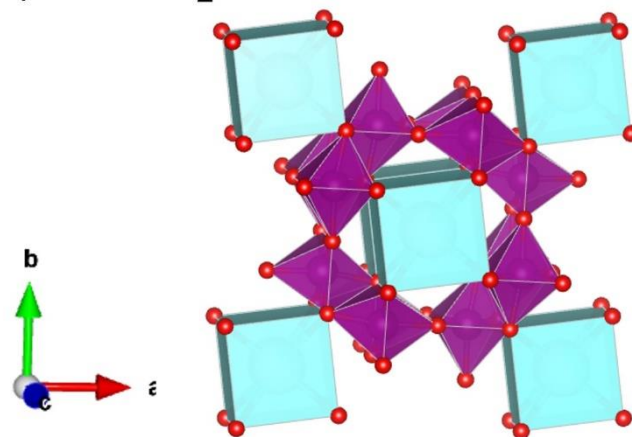

(b)  $\beta$ -MnOOH

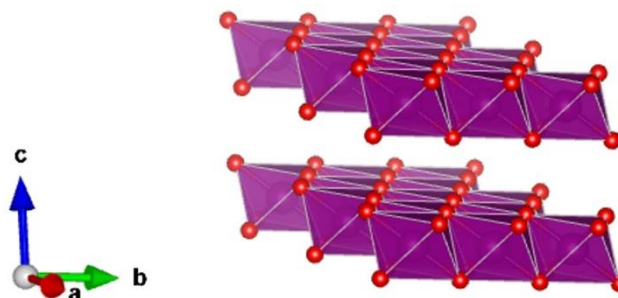

**Figure S1.** Crystal structures of (a)  $\alpha$ -MnO<sub>2</sub> and (b)  $\beta$ -MnOOH. Crystal structure of feitknechtite belongs to the space group of  $P\bar{3}m1$  with unit cell dimensions  $a = 3.32 \text{ \AA}$ , and  $c = 4.71 \text{ \AA}$ .

**Table S1.** Comparison of NO conversion at near 120 °C over OMS-2 related catalysts.

| Sample                              | Dopant | NO conversion / % | GHSV / h <sup>-1</sup> | Temperature / °C | Ref.      |
|-------------------------------------|--------|-------------------|------------------------|------------------|-----------|
| OMS-2                               | -      | 77                | 40000                  | 120              | This work |
| Milled for 15 min                   | -      | 60                | 100000                 | 120              | This work |
| Milled for 55 min                   | -      | 100               | 70000                  | 120              | This work |
| Milled for 95 min                   | -      | 82                | 70000                  | 120              | This work |
| MnCe(n)Ox (n = 0)                   | -      | 94                | 18000                  | 110              | 1         |
| MnCe(n)Ox (n = 0.3)                 | Ce     | < 95              | 18000                  | 110              | 1         |
| MnCe(n)Ox (n = 0.5)                 | Ce     | < 95              | 18000                  | 110              | 1         |
| MnO <sub>2</sub>                    | -      | 83                | 15000                  | 125              | 2         |
| Fe <sub>0.2%</sub> MnO <sub>2</sub> | Fe     | 91                | 15000                  | 125              | 2         |
| Fe <sub>0.5%</sub> MnO <sub>2</sub> | Fe     | 96                | 15000                  | 125              | 2         |
| Fe <sub>1%</sub> MnO <sub>2</sub>   | Fe     | 92                | 15000                  | 125              | 2         |
| Fe <sub>5%</sub> MnO <sub>2</sub>   | Fe     | 91                | 15000                  | 125              | 2         |
| K-OMS-2                             | -      | 77                | 64000                  | 120              | 3         |
| Zn-OMS-2                            | Zn     | 89                | 64000                  | 120              | 3         |
| Fe-K-OMS-2                          | Fe     | 88                | 64000                  | 120              | 3         |
| Zr-K-OMS-2                          | Zr     | 99                | 64000                  | 120              | 3         |
| V-K-OMS-2                           | V      | 56                | 64000                  | 120              | 3         |
| W-K-OMS-2                           | W      | 16                | 64000                  | 120              | 3         |
| Mo-K-OMS-2                          | Mo     | 28                | 64000                  | 120              | 3         |
| K-OMS-2                             | -      | 55                | 64000                  | 120              | 4         |
| Ce(0.06)-K-OMS-2                    | Ce     | 55                | 64000                  | 120              | 4         |
| Ce(0.12)-K-OMS-2                    | Ce     | 93                | 64000                  | 120              | 4         |
| Ce(0.24)-K-OMS-2                    | Ce     | 95                | 64000                  | 120              | 4         |
| Ce(0.48)-K-OMS-2                    | Ce     | 93                | 64000                  | 120              | 4         |
| OMS-2                               | -      | 80                | 30000                  | 120              | 4         |
| Ti-OMS-2                            | Ti     | 82                | 30000                  | 120              | 4         |

# Reference

1. Y. Wei *et al.*, *Catal. Sci. Technol.*, **2017**, 7, 1565-1572.
2. H. Fan *et al.*, *Catal. Sci. Technol.*, **2021**, 11, 6553-6563.
3. X. Wu *et al.*, *Catal. Sci. Technol.*, **2019**, 9, 4108-4117.
4. X. Wu *et al.*, *J. Phys. Chem. C*, **2019**, 123, 10981-10990.
